# Supplementary material for: Use of incretin-based drugs and risk of cholangiocarcinoma: Scandinavian cohort study
Source: PubMed Central journal article supplement (PMC8423638; doi:10.1007/s00125-021-05508-1), 2021-07-13
Supplement: 125_2021_5508_MOESM1_ESM.pdf [file 125_2021_5508_MOESM1_ESM.pdf]

**Electronic Supplementary Material (ESM)**

Ueda P et al. Use of Incretin-based Drugs and Risk of Cholangiocarcinoma: Scandinavian Cohort Study

## **ESM Methods**

### *Data sources*

We used nationwide health and administrative registers in Sweden, Denmark and Norway. From the national prescription registers in each of the three countries, we obtained data on filled prescriptions.<sup>1-4</sup> These registers include information regarding all drug prescriptions filled (the anatomical therapeutic chemical [ATC] code of the dispensed drug and information about the amount of drug dispensed, and the date when the prescription was filled) at all pharmacies in the countries since July, 2005, in Sweden, 1995 in Denmark, and 2004 in Norway. From the national patient registers information on outpatient and emergency department visits and inpatient admissions to all public hospitals and private specialist care were obtained.<sup>5-7</sup> This information, which is registered as physician-assigned procedure codes, and diagnoses according to the International Classification of Diseases, tenth revision (ICD10), was used to obtain data about history of disease for each patient. The population registers of each country provided information on age, sex, country of birth, migration status, civil status (Norway) and vital status of the patients.<sup>8-10</sup> From Statistics Denmark and Statistics Sweden<sup>8</sup> we obtained data on patients' and civil status. The national cancer registers provided data on diagnoses of cholangiocarcinoma. Reporting to these is mandatory for every cancer diagnosed, with the majority of cases (89%-99%) being morphologically verified.<sup>11-13</sup>

**ESM Table 1** ATC codes for DPP4 inhibitors, GLP1-receptor-agonists and sulfonylureas.

| <b>Drug class</b>      | <b>ATC-codes</b>                                                                                         |
|------------------------|----------------------------------------------------------------------------------------------------------|
| DPP4 inhibitors        | A10BH, A10BD07, A10BD08, A10BD09, A10BD10, A10BD11, A10BD13, A10BD19, A10BD21, A10BD22, A10BD24, A10BD25 |
| GLP1-receptor-agonists | A10BJ, A10AE54, A10AE56                                                                                  |
| Sulfonylureas          | A10BB, A10BD01, A10BD02, A10BD04, A10BD06                                                                |

**ESM Table 2** ICD10 and procedure codes for exclusion criteria.

|     | <b>Category</b>                                                                                                                                                                                                                                                | <b>Codes (ICD-10, NCSP, or ATC)</b>                                         |
|-----|----------------------------------------------------------------------------------------------------------------------------------------------------------------------------------------------------------------------------------------------------------------|-----------------------------------------------------------------------------|
| 1.  | Cholangiocarcinoma any time before cohort entry                                                                                                                                                                                                                | C22.1, C23, C24                                                             |
| 2.  | Healthcare visit for any cancer (except non-melanoma skin cancer) within previous year                                                                                                                                                                         | C00-C43, C45-C97                                                            |
| 3.  | HIV before cohort entry <sup>a</sup>                                                                                                                                                                                                                           | B20-B24                                                                     |
| 4.  | Hepatitis B or C before cohort entry <sup>a</sup>                                                                                                                                                                                                              | B18.0, B18.1, B18.2                                                         |
| 5.  | Congenital cystic disease of the liver or choledochal duct <sup>a</sup>                                                                                                                                                                                        | Q44.4, <sup>b</sup> Q44.6 <sup>b</sup>                                      |
| 6.  | Primary sclerosing cholangitis before cohort entry <sup>a</sup>                                                                                                                                                                                                | K83.0A (K83.0 in Norway) <sup>c</sup>                                       |
| 7.  | Cystic fibrosis before cohort entry <sup>a</sup>                                                                                                                                                                                                               | E84                                                                         |
| 8.  | Endstage illness (severe malnutrition, cachexia, dementia, coma) before cohort entry <sup>a</sup>                                                                                                                                                              | ICD-10: E40-E43, F00-F03, G30, R40.2 <sup>b</sup> , R64; ATC: N06D          |
| 9.  | Drug misuse within last year before cohort entry                                                                                                                                                                                                               | ICD-10: F11-F16, F18, F19, R78.1-R78.5, T40; <sup>b</sup> ATC: N07BB, N07BC |
| 10. | Major pancreatic disease (chronic pancreatitis [defined by pancreatic enzyme substitution prescription within last year or diagnosis at any time before index date], pancreatic cancer, major pancreatic surgery at any time before cohort entry) <sup>a</sup> | ICD-10: C25, K86.0, K86.1; NCSP: JLC, JLE; ATC: A09AA02                     |
| 11. | No hospital contact or prescription drug in last year prior to the cohort entry                                                                                                                                                                                | n.a.                                                                        |

<sup>a</sup> 10-year look-back for Sweden and Denmark and 5-year look-back for Norway.

<sup>b</sup> Not available in Norwegian dataset.

<sup>c</sup> In Norway, the 4-level code (cholangitis) was used because 5-level data for this ICD10-code was not available.

Abbreviations: ICD, International Classification of Diseases; NCSP, NOMESCO Classification of Surgical Procedures; ATC, Anatomical Therapeutic Chemical

#### *Rationale for exclusion criteria*

Exclusion criteria constituted history of the outcome (1), relatively rare risk factors for the outcome or factors associated with the likelihood of detecting the outcome for which information regarding severity was not available (2)-(7), factors associated with the likelihood of receiving a diagnosis of the outcome or health seeking behavior (8)-(9) or potential use of the study drugs with an indication other than type 2 diabetes (10). Patients with no hospital contact or prescription drug in the last year (11) may have recently immigrated or have incomplete information regarding medical history, previous exposure to the study drugs and other information that we use in the analyses.

**ESM Table 3** Definitions of variables adjusted for in the multivariable Cox regression models.

| <b>Sociodemographic characteristics</b>                                                                                                                            | <b>ICD 10 codes/procedure codes/categories</b>                                                                                                                                                                                                                                                                                                                      |
|--------------------------------------------------------------------------------------------------------------------------------------------------------------------|---------------------------------------------------------------------------------------------------------------------------------------------------------------------------------------------------------------------------------------------------------------------------------------------------------------------------------------------------------------------|
| Age group                                                                                                                                                          | Cubic splines                                                                                                                                                                                                                                                                                                                                                       |
| Sex                                                                                                                                                                | Women/men                                                                                                                                                                                                                                                                                                                                                           |
| Place of birth                                                                                                                                                     | Scandinavia; Rest of Europe; Outside Europe, Missing                                                                                                                                                                                                                                                                                                                |
| Living with partner                                                                                                                                                | Yes/no                                                                                                                                                                                                                                                                                                                                                              |
| Country                                                                                                                                                            | Sweden; Denmark; Norway                                                                                                                                                                                                                                                                                                                                             |
| <b>Medical history<sup>a</sup></b>                                                                                                                                 |                                                                                                                                                                                                                                                                                                                                                                     |
| Cardiovascular disease                                                                                                                                             | ICD-10: I110, I11, I20, I21, I22, I24, I25, I130, I132, I34-I37, I42, I43, I44-I47, I48, I49, I50, I60-I64, I65-I69, I70, I72, I73, I74, I77, J81, G45 (excl G454), G46, K550, K551, E115, E145, E135<br><br>Procedure codes: NFQ, NGQ, NHQ                                                                                                                         |
| Other diabetes complications (renal complications, eye complications, neuropathy, hypoglycemia, metabolic acidosis, unspecified complications, foot complications) | ICD-10: E112, E142, I120, I131, I132, N00-08, N10-N16, N17, N18, N19, N20-N23, N25-N29, E110, E111, E113, E114, E116, E117, E118, E130, E131, E133, E134, E136, E137, E138, E140, E141, E143, E144, E146, E147, E148, E160, E161, E162, G990, G590, G632, H280 <sup>a</sup> , H358, H360, M142, M146, M908, L984<br><br>Procedure codes: CKC10, CKC12, CKC15, CKD65 |
| Cancer (excl non-melanoma skin cancer)                                                                                                                             | ICD-10: C00-C43, C45-C97                                                                                                                                                                                                                                                                                                                                            |
| Gall bladder or pancreatic disorders                                                                                                                               | K80-K87 (except K83.0A <sup>c</sup> ), Q44 <sup>b</sup> (except Q44.4 and Q44.6)                                                                                                                                                                                                                                                                                    |
| Liver disease                                                                                                                                                      | K70-K77, E83.1 <sup>b</sup>                                                                                                                                                                                                                                                                                                                                         |
| Inflammatory bowel disease                                                                                                                                         | K50-K52                                                                                                                                                                                                                                                                                                                                                             |
| Other alcohol-related disorders                                                                                                                                    | F10                                                                                                                                                                                                                                                                                                                                                                 |
| <b>Diabetes drugs in the last 6 months</b>                                                                                                                         |                                                                                                                                                                                                                                                                                                                                                                     |
| No diabetes drug                                                                                                                                                   | Not any A10                                                                                                                                                                                                                                                                                                                                                         |
| Metformin                                                                                                                                                          | A10BA02, A10BD07, A10BD08, A10BD10, A10BD11, A10BD13, A10BD22, A10BD25, A10BD03, A10BD05, A10BD14, A10BD15, A10BD16, A10BD20, A10BD23, A10BD02                                                                                                                                                                                                                      |
| Insulin                                                                                                                                                            | A10A, A10AE54, A10AE56                                                                                                                                                                                                                                                                                                                                              |
| Thiazolidinediones                                                                                                                                                 | A10BG, A10BD03, A10BD04, A10BD05, A10BD06, A10BD09                                                                                                                                                                                                                                                                                                                  |
| Other antidiabetics (glinides, acarbose)                                                                                                                           | A10BF01, A10BD14, A10BX                                                                                                                                                                                                                                                                                                                                             |
| GLP1-receptor-agonists <sup>d</sup>                                                                                                                                | A10BJ, A10AE54, A10AE56                                                                                                                                                                                                                                                                                                                                             |
| DPP4 inhibitors <sup>e</sup>                                                                                                                                       | A10BD07, A10BD08, A10BD09, A10BD10, A10BD11, A10BD13, A10BD19, A10BD21, A10BD22, A10BD24, A10BD25                                                                                                                                                                                                                                                                   |
| <b>Health care utilization in previous year</b>                                                                                                                    |                                                                                                                                                                                                                                                                                                                                                                     |
| Hospitalization due to type 2 diabetes                                                                                                                             | E11 (primary position)                                                                                                                                                                                                                                                                                                                                              |

|                                           |                            |
|-------------------------------------------|----------------------------|
| Hospitalization due to other causes       | Not E11 (primary position) |
| Outpatient contact due to type 2 diabetes | E11 (primary position)     |
| Outpatient contact due to other causes    | Not E11 (primary position) |

<sup>a</sup> 10-year look-back for Sweden and Denmark and 5-year look-back for Norway.

<sup>b</sup> Not available in Norway.

<sup>c</sup> K83.0 in Norway.

<sup>d</sup> In analyses of DPP4 inhibitors.

<sup>e</sup> In analyses of GLP1-receptor-agonists.

**ESM Table 4** Association between use of DPP4 inhibitors and GLP1-receptor-agonists, respectively, and risk of cholangiocarcinoma in each country.

|                                           |                        | N     | Events | Events per 100000 person-years | Unadjusted hazard ratio (95% CI) | Adjusted <sup>a</sup> hazard ratio (95% CI) |
|-------------------------------------------|------------------------|-------|--------|--------------------------------|----------------------------------|---------------------------------------------|
| <b>Analysis of DPP4 inhibitors</b>        |                        |       |        |                                |                                  |                                             |
| Denmark                                   | DPP4 inhibitors        | 70338 | 78     | 25                             | 1.40 (0.94 to 2.10)              | 1.28 (0.82 to 2.00)                         |
|                                           | Sulfonylureas          | 37797 | 34     | 18                             | [reference]                      | [reference]                                 |
| Sweden                                    | DPP4 inhibitors        | 91664 | 95     | 30                             | 1.17 (0.87 to 1.58)              | 1.12 (0.81 to 1.54)                         |
|                                           | Sulfonylureas          | 70009 | 82     | 26                             | [reference]                      | [reference]                                 |
| Norway                                    | DPP4 inhibitors        | 60575 | 49     | 21                             | 0.99 (0.52 to 1.86)              | 1.01 (0.51 to 1.97)                         |
|                                           | Sulfonylureas          | 16102 | 12     | 21                             | [reference]                      | [reference]                                 |
| <b>Analysis of GLP1-receptor-agonists</b> |                        |       |        |                                |                                  |                                             |
| Denmark                                   | GLP1-receptor-agonists | 38448 | 40     | 23                             | 1.26 (0.81 to 1.96)              | 1.17 (0.67 to 2.04)                         |
|                                           | Sulfonylureas          | 42791 | 42     | 19                             | [reference]                      | [reference]                                 |
| Sweden                                    | GLP1-receptor-agonists | 40868 | 42     | 33                             | 1.35 (0.93 to 1.96)              | 1.40 (0.87 to 2.24)                         |
|                                           | Sulfonylureas          | 77457 | 96     | 26                             | [reference]                      | [reference]                                 |
| Norway                                    | GLP1-receptor-agonists | 17497 | 10     | 17                             | 0.78 (0.36 to 1.68)              | 0.79 (0.31 to 2.04)                         |
|                                           | Sulfonylureas          | 22330 | 19     | 21                             | [reference]                      | [reference]                                 |

<sup>a</sup> Adjusted for age, sex, place of birth, cohabitation status, history of cardiovascular disease, diabetes complications, cancer (more than 1 year before cohort entry), gallbladder or pancreatic disorders, liver disease, inflammatory bowel disease and alcohol-related disorders, as well as diabetes medications and measures of healthcare utilization.

**ESM Table 5** Number and proportion of cholangiocarcinoma by type for each study drug in the primary analyses. Numbers are shown in n (%)

|               | <b>Analyses of DPP4 inhibitors</b> |               | <b>Analyses of GLP1-receptor-agonists</b> |               |
|---------------|------------------------------------|---------------|-------------------------------------------|---------------|
|               | DPP4 inhibitors                    | Sulfonylureas | GLP1-receptor-agonists                    | Sulfonylureas |
| Extrahepatic  | 118 (53.2)                         | 67 (52.3)     | 47 (51.1)                                 | 81 (51.6)     |
| Intrahepatic  | 80 (36.0)                          | 41 (32.0)     | 36 (39.1)                                 | 51 (32.5)     |
| Uncategorized | 24 (10.8)                          | 20 (15.6)     | 9 (9.8)                                   | 25 (15.9)     |



**ESM Table 6** Association between use of DPP4 inhibitors and GLP1-receptor-agonists, respectively, and risk of cholangiocarcinoma by time since treatment initiation.

|                                           |                        | N      | Events | Events per 100000 person-years | Unadjusted hazard ratio (95% CI) | Adjusted <sup>a</sup> hazard ratio (95% CI) |
|-------------------------------------------|------------------------|--------|--------|--------------------------------|----------------------------------|---------------------------------------------|
| <b>Analysis of DPP4 inhibitors</b>        |                        |        |        |                                |                                  |                                             |
| 1 to <3 years                             | DPP4 inhibitors        | 222577 | 80     | 22                             | 0.99 (0.69 to 1.41)              | 1.03 (0.69 to 1.52)                         |
|                                           | Sulfonylureas          | 123908 | 47     | 22                             | [reference]                      | [reference]                                 |
| 3 to <6 years                             | DPP4 inhibitors        | 151530 | 92     | 28                             | 1.52 (1.04 to 2.21)              | 1.47 (0.97 to 2.22)                         |
|                                           | Sulfonylureas          | 90719  | 38     | 18                             | [reference]                      | [reference]                                 |
| ≥6 years                                  | DPP4 inhibitors        | 75765  | 50     | 32                             | 0.94 (0.62 to 1.41)              | 0.92 (0.58 to 1.47)                         |
|                                           | Sulfonylureas          | 50608  | 43     | 34                             | [reference]                      | [reference]                                 |
| <b>Analysis of GLP1-receptor-agonists</b> |                        |        |        |                                |                                  |                                             |
| 1 to <3 years                             | GLP1-receptor-agonists | 96813  | 34     | 21                             | 1.04 (0.68 to 1.60)              | 1.40 (0.81 to 2.43)                         |
|                                           | Sulfonylureas          | 142578 | 52     | 21                             | [reference]                      | [reference]                                 |
| 3 to <6 years                             | GLP1-receptor-agonists | 64249  | 40     | 28                             | 1.34 (0.89 to 2.01)              | 1.18 (0.69 to 2.03)                         |
|                                           | Sulfonylureas          | 109922 | 54     | 21                             | [reference]                      | [reference]                                 |
| ≥6 years                                  | GLP1-receptor-agonists | 33374  | 18     | 32                             | 1.08 (0.63 to 1.87)              | 1.11 (0.54 to 2.25)                         |
|                                           | Sulfonylureas          | 64358  | 51     | 31                             | [reference]                      | [reference]                                 |

**ESM Table 7** Patient characteristics of new users of DPP4 inhibitors and sulfonylureas and GLP1-receptor-agonists and sulfonylureas, respectively, for sensitivity analyses using a traditional active-comparator new-user design based on the first treatment episode during the study period.

|                             | Cohort for analysis of<br>DPP4 inhibitors |                             | Cohort for analysis of<br>GLP1-receptor-agonists |                             |
|-----------------------------|-------------------------------------------|-----------------------------|--------------------------------------------------|-----------------------------|
|                             | DPP4<br>inhibitors<br>(N=157221)          | Sulfonylureas<br>(N=142057) | GLP1-<br>receptor-<br>agonists<br>(N=68647)      | Sulfonylureas<br>(N=156890) |
| <i>Country</i>              |                                           |                             |                                                  |                             |
| Sweden                      | 73987 (47.1)                              | 78716 (55.4)                | 34658 (50.5)                                     | 84250 (53.7)                |
| Denmark                     | 45385 (28.9)                              | 43359 (30.5)                | 24289 (35.4)                                     | 47714 (30.4)                |
| Norway                      | 37849 (24.1)                              | 19982 (14.1)                | 9700 (14.1)                                      | 24926 (15.9)                |
| Age, mean (SD)              | 63.5 (12.0)                               | 64.6 (12.5)                 | 58.3 (10.9)                                      | 64.4 (12.4)                 |
| Female                      | 63008 (40.1)                              | 61128 (43.0)                | 30887 (45.0)                                     | 67125 (42.8)                |
| <i>Place of birth</i>       |                                           |                             |                                                  |                             |
| Scandinavia                 | 133109 (84.7)                             | 117353 (82.6)               | 60343 (87.9)                                     | 129255 (82.4)               |
| Rest of Europe              | 10068 (6.4)                               | 9753 (6.9)                  | 3590 (5.2)                                       | 10942 (7.0)                 |
| Outside Europe              | 13868 (8.8)                               | 14714 (10.4)                | 4658 (6.8)                                       | 16425 (10.5)                |
| Missing                     | 176 (0.1)                                 | 237 (0.2)                   | 56 (0.1)                                         | 268 (0.2)                   |
| <i>Civil status</i>         |                                           |                             |                                                  |                             |
| Married/living with partner | 88471 (56.3)                              | 77781 (54.8)                | 38307 (55.8)                                     | 86250 (55.0)                |
| Single                      | 67751 (43.1)                              | 62649 (44.1)                | 30043 (43.8)                                     | 68916 (43.9)                |
| Missing                     | 999 (0.6)                                 | 1627 (1.1)                  | 297 (0.4)                                        | 1724 (1.1)                  |
| <i>Calendar year</i>        |                                           |                             |                                                  |                             |
| 2007-2009                   | 10781 (6.9)                               | 42758 (30.1)                | 2208 (3.2)                                       | 43457 (27.7)                |
| 2010-2012                   | 31770 (20.2)                              | 46614 (32.8)                | 16005 (23.3)                                     | 50230 (32.0)                |
| 2013-2015                   | 46336 (29.5)                              | 32431 (22.8)                | 16592 (24.2)                                     | 37495 (23.9)                |
| 2016-2018                   | 68334 (43.5)                              | 20254 (14.3)                | 33842 (49.3)                                     | 25708 (16.4)                |
| <i>Comorbidities</i>        |                                           |                             |                                                  |                             |
| Cardiovascular disease      | 49446 (31.4)                              | 43488 (30.6)                | 20481 (29.8)                                     | 47565 (30.3)                |

|                                                     |               |              |              |               |
|-----------------------------------------------------|---------------|--------------|--------------|---------------|
| Diabetic complications                              | 49227 (31.3)  | 38230 (26.9) | 27027 (39.4) | 42668 (27.2)  |
| Cancer (excl non-melanoma skin cancer) <sup>a</sup> | 7840 (5.0)    | 6766 (4.8)   | 2829 (4.1)   | 7456 (4.8)    |
| Gall bladder or pancreatic disorders                | 7016 (4.5)    | 6775 (4.8)   | 3605 (5.3)   | 7387 (4.7)    |
| Liver disease                                       | 2343 (1.5)    | 1897 (1.3)   | 1270 (1.9)   | 2087 (1.3)    |
| Inflammatory bowel disease                          | 3448 (2.2)    | 3044 (2.1)   | 1765 (2.6)   | 3355 (2.1)    |
| Other alcohol-related disorders                     | 2514 (1.6)    | 2456 (1.7)   | 1263 (1.8)   | 2624 (1.7)    |
| <i>Health care utilization in last year</i>         |               |              |              |               |
| Hospitalization due to type 2 diabetes              | 3261 (2.1)    | 3459 (2.4)   | 1811 (2.6)   | 3611 (2.3)    |
| Hospitalization due to other causes                 | 30676 (19.5)  | 28706 (20.2) | 12545 (18.3) | 31013 (19.8)  |
| Outpatient contact due to type 2 diabetes           | 21578 (13.7)  | 12101 (8.5)  | 15851 (23.1) | 14883 (9.5)   |
| Outpatient contact due to other causes              | 84732 (53.9)  | 72290 (50.9) | 41535 (60.5) | 79802 (50.9)  |
| <i>Diabetes drugs in last 6 months</i>              |               |              |              |               |
| None                                                | 22782 (14.5)  | 40877 (28.8) | 8503 (12.4)  | 41396 (26.4)  |
| Metformin                                           | 125198 (79.6) | 97640 (68.7) | 49550 (72.2) | 109986 (70.1) |
| Insulin                                             | 20600 (13.1)  | 6161 (4.3)   | 26489 (38.6) | 6433 (4.1)    |
| Thiazolidinediones                                  | 3746 (2.4)    | 2357 (1.7)   | 971 (1.4)    | 2596 (1.7)    |
| Other antidiabetics (glinides, acarbose)            | 4515 (2.9)    | 2431 (1.7)   | 1963 (2.9)   | 2712 (1.7)    |
| GLP-1-receptor-agonists                             | 2310 (1.5)    | 1610 (1.1)   | -            | -             |
| DPP4 inhibitors                                     | -             | -            | 5303 (7.7)   | 5552 (3.5)    |

<sup>a</sup> Recorded more than 1 year prior to start of treatment episode.

**ESM Table 8** Patient characteristics of new users of DPP4 inhibitors and SGLT2 inhibitors and GLP1-receptor-agonists and SGLT2 inhibitors, respectively, for sensitivity analyses.

|                                                     | Cohort for analysis of<br>DPP4 inhibitors |                                  | Cohort for analysis of<br>GLP1-receptor-agonists |                                  |
|-----------------------------------------------------|-------------------------------------------|----------------------------------|--------------------------------------------------|----------------------------------|
|                                                     | DPP4<br>inhibitors<br>(N=160488)          | SGLT2<br>inhibitors<br>(N=61679) | GLP1-<br>receptor-<br>agonists<br>(N=68350)      | SGLT2<br>inhibitors<br>(N=89876) |
| --                                                  |                                           |                                  |                                                  |                                  |
| <i>Country</i>                                      |                                           |                                  |                                                  |                                  |
| Sweden                                              | 78269 (48.8)                              | 29839 (48.4)                     | 36421 (53.3)                                     | 37872 (42.1)                     |
| Denmark                                             | 42085 (26.2)                              | 17788 (28.8)                     | 19626 (28.7)                                     | 25004 (27.8)                     |
| Norway                                              | 40134 (25.0)                              | 14052 (22.8)                     | 12303 (18.0)                                     | 27000 (30.0)                     |
| Age, mean (SD)                                      | 65.7 (12.2)                               | 61.6 (10.8)                      | 60.1 (11.2)                                      | 62.5 (10.8)                      |
| Female                                              | 65209 (40.6)                              | 22732 (36.9)                     | 30122 (44.1)                                     | 32714 (36.4)                     |
| <i>Place of birth</i>                               |                                           |                                  |                                                  |                                  |
| Scandinavia                                         | 133152 (83.0)                             | 51307 (83.2)                     | 58622 (85.8)                                     | 72749 (80.9)                     |
| Rest of Europe                                      | 10628 (6.6)                               | 4086 (6.6)                       | 4021 (5.9)                                       | 6549 (7.3)                       |
| Outside Europe                                      | 16532 (10.3)                              | 6234 (10.1)                      | 5652 (8.3)                                       | 10485 (11.7)                     |
| Missing                                             | 176 (0.1)                                 | 52 (0.1)                         | 55 (0.1)                                         | 93 (0.1)                         |
| <i>Civil status</i>                                 |                                           |                                  |                                                  |                                  |
| Married/living with partner                         | 88301 (55.0)                              | 34447 (55.8)                     | 37426 (54.8)                                     | 51464 (57.3)                     |
| Single                                              | 71292 (44.4)                              | 26959 (43.7)                     | 30675 (44.9)                                     | 38029 (42.3)                     |
| Missing                                             | 895 (0.6)                                 | 273 (0.4)                        | 249 (0.4)                                        | 383 (0.4)                        |
| <i>Calendar year</i>                                |                                           |                                  |                                                  |                                  |
| 2013-2015                                           | 68973 (43.0)                              | 12784 (20.7)                     | 25765 (37.7)                                     | 19630 (21.8)                     |
| 2016-2018                                           | 91515 (57.0)                              | 48895 (79.3)                     | 42585 (62.3)                                     | 70246 (78.2)                     |
| <i>Comorbidities</i>                                |                                           |                                  |                                                  |                                  |
| Cardiovascular disease                              | 55430 (34.5)                              | 21602 (35.0)                     | 20936 (30.6)                                     | 29715 (33.1)                     |
| Diabetic complications                              | 57739 (36.0)                              | 23648 (38.3)                     | 27940 (40.9)                                     | 32000 (35.6)                     |
| Cancer (excl non-melanoma skin cancer) <sup>a</sup> | 9308 (5.8)                                | 2753 (4.5)                       | 3173 (4.6)                                       | 4010 (4.5)                       |

|                                                      |               |              |              |              |
|------------------------------------------------------|---------------|--------------|--------------|--------------|
| Gall bladder or pancreatic disorders                 | 7268 (4.5)    | 2786 (4.5)   | 3419 (5.0)   | 3648 (4.1)   |
| Liver disease                                        | 2435 (1.5)    | 993 (1.6)    | 1264 (1.9)   | 1346 (1.5)   |
| Inflammatory bowel disease                           | 3855 (2.4)    | 1488 (2.4)   | 1771 (2.6)   | 1960 (2.2)   |
| Other alcohol-related disorders                      | 2633 (1.6)    | 997 (1.6)    | 1234 (1.8)   | 1335 (1.5)   |
| <i>Health care utilization in last year</i>          |               |              |              |              |
| Hospitalization due to type 2 diabetes               | 3313 (2.1)    | 910 (1.5)    | 1525 (2.2)   | 1123 (1.2)   |
| Hospitalization not due to type 2 diabetes causes    | 34214 (21.3)  | 11156 (18.1) | 12303 (18.0) | 14961 (16.6) |
| Outpatient contact due to type 2 diabetes            | 24041 (15.0)  | 12145 (19.7) | 16288 (23.8) | 18081 (20.1) |
| Outpatient contact not due to type 2 diabetes causes | 89708 (55.9)  | 34724 (56.3) | 41043 (60.0) | 48616 (54.1) |
| <i>Diabetes drugs in last 6 months</i>               |               |              |              |              |
| No diabetes drug in last 6 months                    | 20142 (12.6)  | 5219 (8.5)   | 7393 (10.8)  | 6010 (6.7)   |
| Metformin                                            | 123457 (76.9) | 49249 (79.8) | 49043 (71.8) | 73498 (81.8) |
| Insulin                                              | 23489 (14.6)  | 18242 (29.6) | 26540 (38.8) | 17251 (19.2) |
| Thiazolidinediones                                   | 965 (0.6)     | 519 (0.8)    | 592 (0.9)    | 853 (0.9)    |
| Other antidiabetics (glinides, acarbose)             | 3495 (2.2)    | 1346 (2.2)   | 1536 (2.2)   | 2048 (2.3)   |
| Sulphonylureas                                       | 33317 (20.8)  | 10401 (16.9) | 12825 (18.8) | 20088 (22.4) |
| GLP-1-receptor-agonists, no. (%)                     | 3040 (1.9)    | 10346 (16.8) | -            | -            |
| DPP4 inhibitors, no. (%)                             | -             | -            | 6215 (9.1)   | 15366 (17.1) |

<sup>a</sup> Recorded more than 1 year prior to start of treatment episode.

**ESM Figure 1** Flow chart of patient inclusion in the study cohort for sensitivity analyses of DPP4 inhibitors and GLP1-receptor-agonists, respectively, using a traditional active-comparator new-user design based on the first treatment episode during the study period.

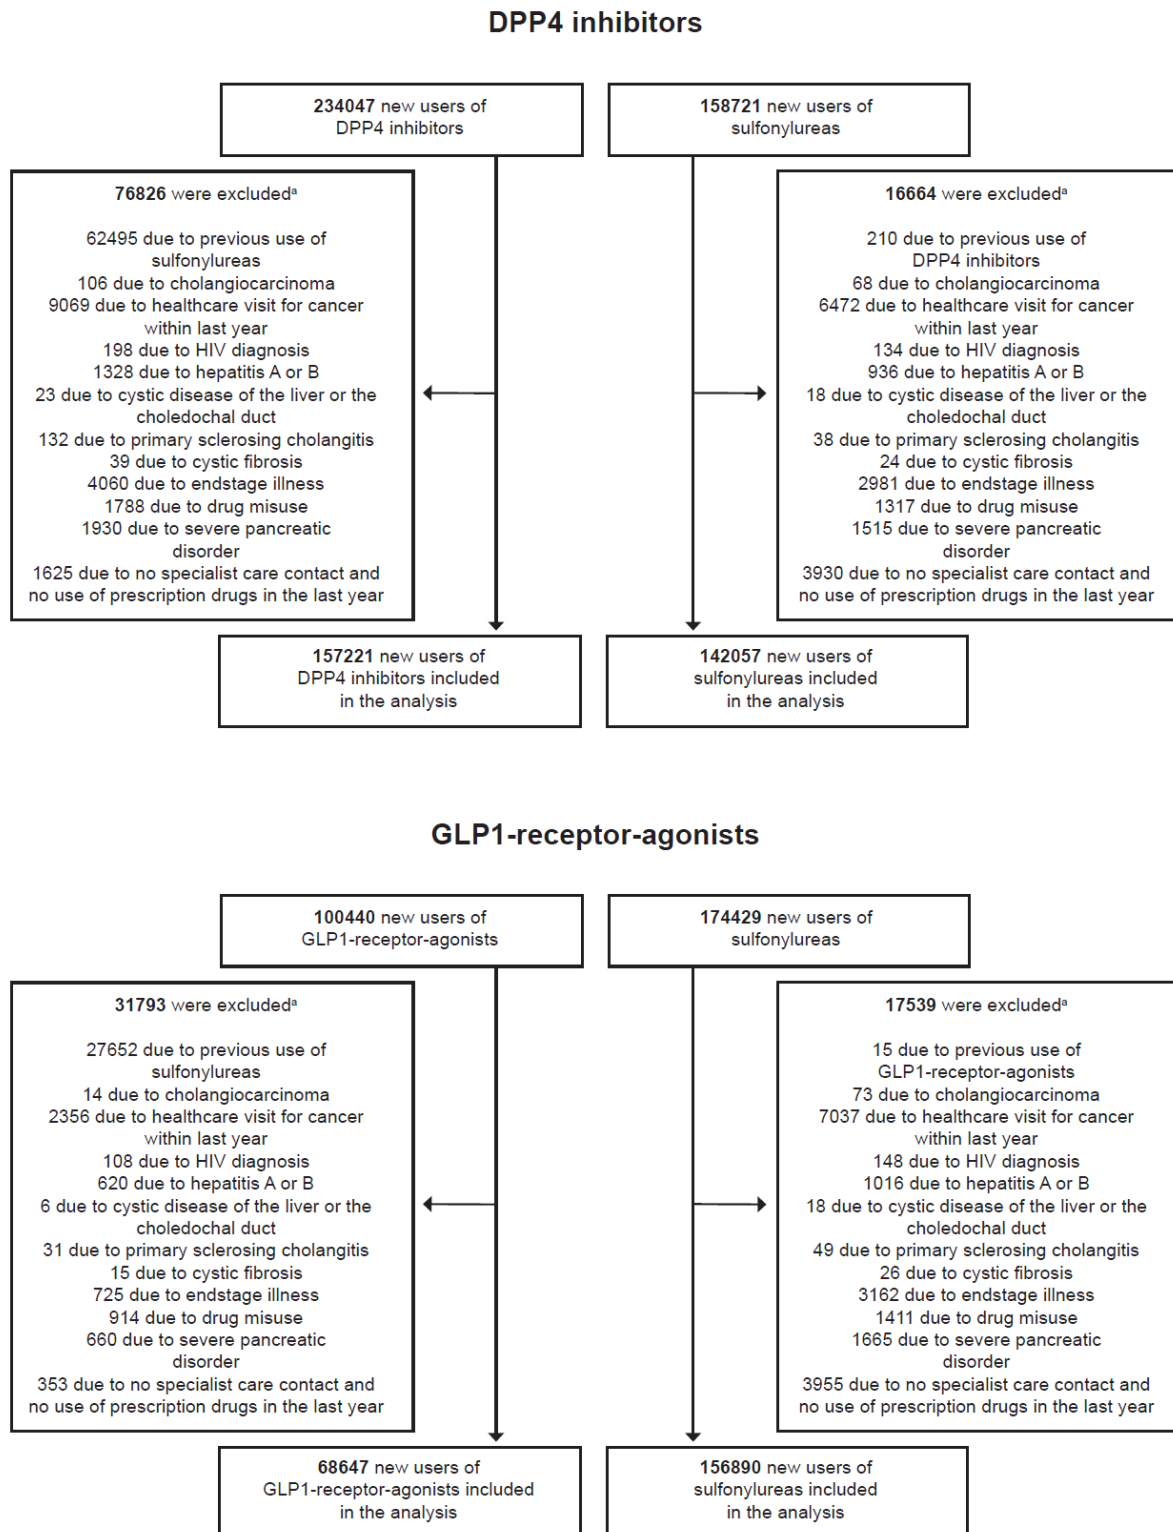

<sup>a</sup> One patient could be excluded due to more than one reason

**ESM Figure 2** Flow chart of patient inclusion in the study cohort for sensitivity analyses of DPP4 inhibitors and GLP1-receptor-agonists, respectively, using SGLT2 inhibitors as the comparator.

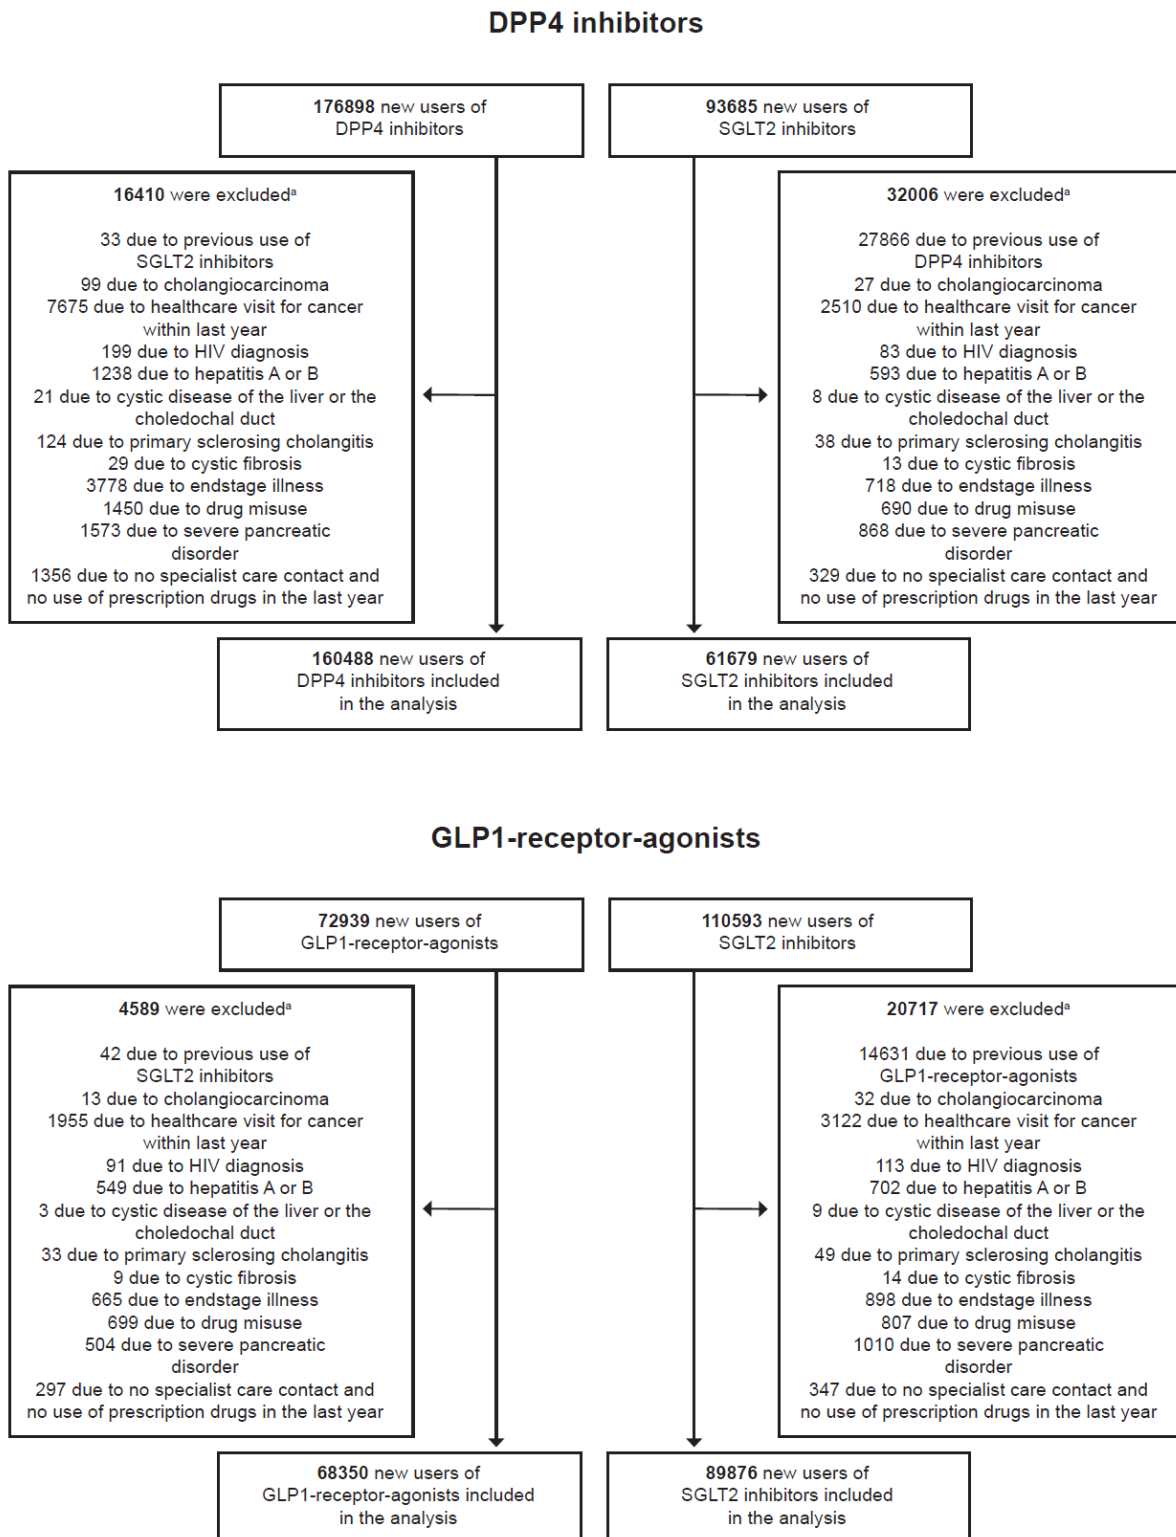

<sup>a</sup> One patient could be excluded due to more than one reason

## References

1. Wettermark B, Hammar N, Fored M, et al. The new Swedish Prescribed Drug Register— Opportunities for pharmacoepidemiological research and experience from the first six months. *Pharmacoepidemiol Drug Saf.* 2007;16(7):726-735.
2. Pottegård A, Schmidt SAJ, Wallach-Kildemoes H, Sørensen HT, Hallas J, Schmidt M. Data Resource Profile: The Danish National Prescription Registry. *Int J Epidemiol.* 2016;46(3):dyw213.
3. Norwegian Institute of Public Health. Norwegian Prescription Database.
4. Furu K, Wettermark B, Andersen M, Martikainen JE, Almarsdottir AB, Sørensen HT. The Nordic Countries as a Cohort for Pharmacoepidemiological Research. *Basic Clin Pharmacol Toxicol.* 2010;106(2):86-94.
5. Ludvigsson JF, Andersson E, Ekbom A, et al. External review and validation of the Swedish national inpatient register. *BMC Public Health.* 2011;11(1):450.
6. Schmidt M, Schmidt SAJ, Sandegaard JL, Ehrenstein V, Pedersen L, Sørensen HT. The Danish National Patient Registry: a review of content, data quality, and research potential. *Clin Epidemiol.* 2015;7:449.
7. Norwegian Institute of Public Health. Overview of the national health registries. 2016.
8. Ludvigsson JF, Almqvist C, Bonamy A-KE, et al. Registers of the Swedish total population and their use in medical research. *Eur J Epidemiol.* 2016;31(2):125-136.
9. Schmidt M, Pedersen L, Sørensen HT. The Danish Civil Registration System as a tool in epidemiology. *Eur J Epidemiol.* 2014;29(8):541-549.
10. National Registry. The Norwegian Tax Administration.
11. Barlow L, Westergren K, Holmberg L, Tälback M. The completeness of the Swedish Cancer Register - A sample survey for year 1998. *Acta Oncol (Madr).* 2009;48(1):27-33.
12. Gjerstorff ML. The Danish cancer registry. *Scand J Public Health.* 2011;39(7):42-45.
13. Larsen IK, Småstuen M, Johannesen TB, et al. Data quality at the Cancer Registry of Norway: An overview of comparability, completeness, validity and timeliness. *Eur J Cancer.* 2009;45(7):1218-1231.
